# Supplementary material
Source: PubMed Central journal article supplement (PMC3377159)
Supplement: NIHMS355213-supplement-1_si_001.pdf [file NIHMS355213-supplement-1_si_001.pdf]

## SUPPLEMENTARY MATERIAL

### Multiplexed *in vivo* His-tagging of enzyme pathways for *in vitro* single-pot multi-enzyme catalysis

Harris H. Wang<sup>1,2,\*</sup>, Po-Yi Huang<sup>1,3,\*</sup>, George Xu<sup>1,4,5</sup>, Wilhelm Haas<sup>6</sup>, Adam Marblestone<sup>2,4</sup>, Jun Li<sup>1</sup>, Steven Gygi<sup>6</sup>, Anthony Forster<sup>7</sup>, Michael C. Jewett<sup>8</sup>, George Church<sup>1,2</sup>

1. Department of Genetics, Harvard Medical School, Boston, MA 02115, USA.
2. Wyss Institute for Biologically Inspired Engineering, Harvard University, Boston, MA 02115, USA.
3. Program in Chemistry and Chemical Biology, Harvard University, Cambridge, MA 02138, USA.
4. Program in Biophysics, Harvard University, Cambridge, MA 02138, USA.
5. Program in Medical Engineering Medical Physics, Harvard-MIT Division of Health Sciences and Technology, Cambridge, MA 02139, USA.
6. Department of Cell Biology, Harvard Medical School, Boston, MA 02115, USA.
7. Department of Cell and Molecular Biology, Uppsala University, Uppsala 75124, Sweden
8. Department of Chemical and Biological Engineering and Chemistry of Life Processes Institute, Northwestern University, Evanston, IL 60208, USA

\* These authors contributed equally to this work.

Correspondences should be addressed to H.H. Wang at [harris.wang@wyss.harvard.edu](mailto:harris.wang@wyss.harvard.edu) or G.

M. Church at [gmc@harvard.edu](mailto:gmc@harvard.edu).

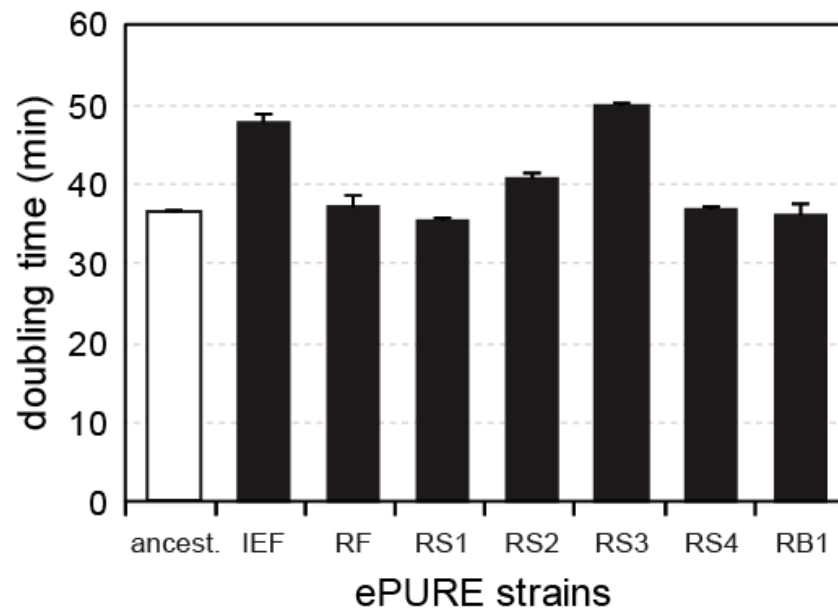

**Supplementary Figure 1.** Growth rates of strains (black bar) in comparison to the ancestral strain (white bar) as determined by time-course spectrophotometry in a 96-well plate. Error bars are  $\pm$  standard deviations, with  $n=3$ . RB2 and RB3 growth rates are not shown since they were not used for subsequent ePURE systems.

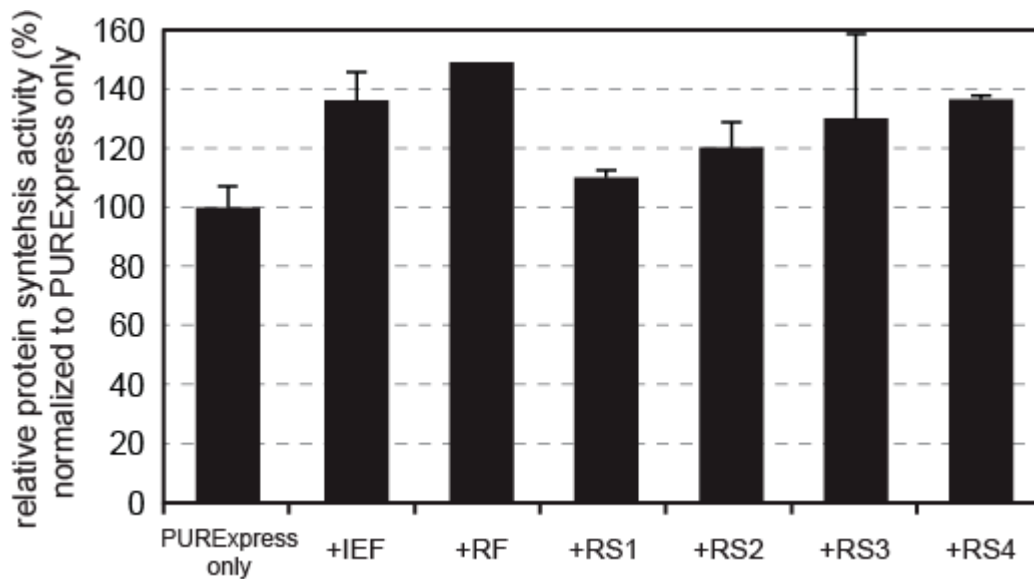

**Supplementary Figure 2.** Supplement PURE in vitro translation reaction with of each ePURE pool of factors to examine the presence of any hypothetical inhibitory contaminants. Translation reactions producing luciferase are performed in 10 $\mu$ L PURExpress reaction with the following amount of ePURE factors added: 0.372 mg/mL of IEF, 0.311 mg/mL of RF, 0.176 mg/mL of RS1, 0.663 mg/mL of RS2, 0.172 mg/mL of RS3, and 0.116 mg/mL of RS4. Activities are measured by luminescence and PURExpress reaction without supplement is set as standard for comparison and normalized to 100%. Error bars are  $\pm$  standard deviations, with n=3

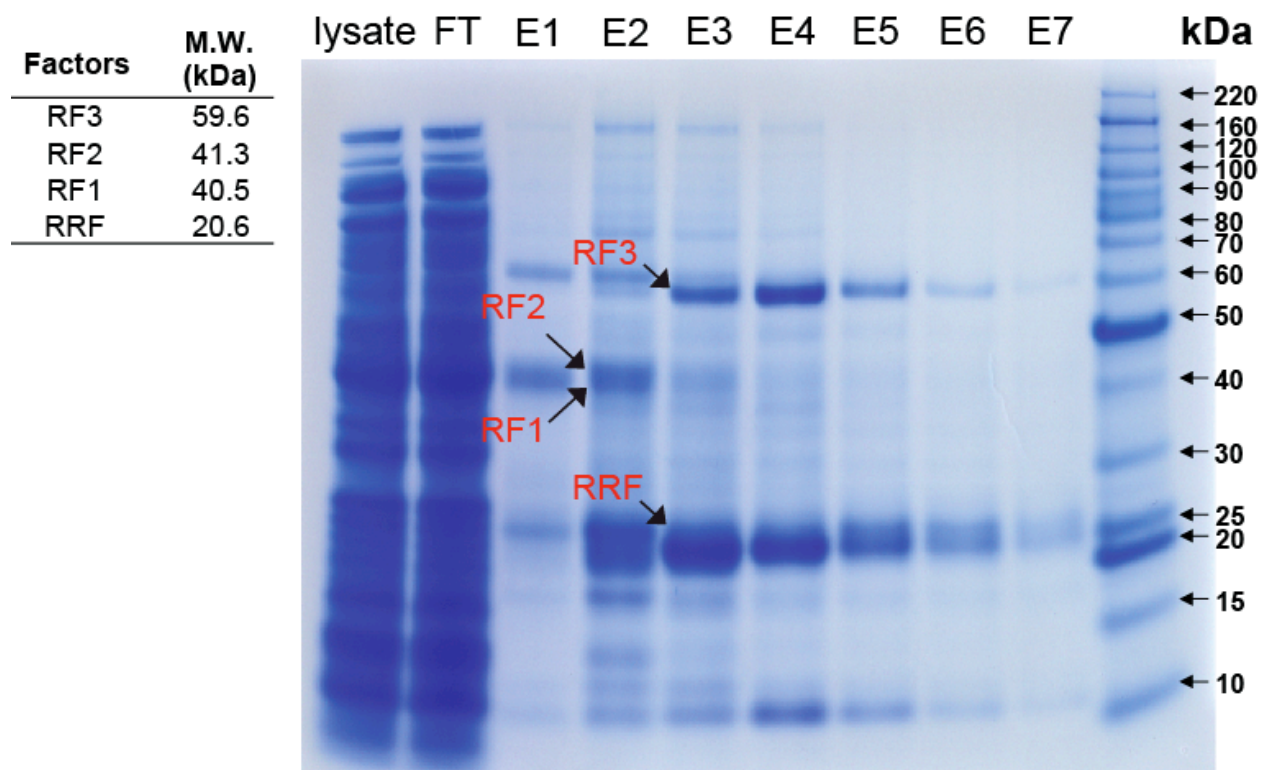

**Supplementary Figure 3.**

Protein gel of His-tagged RF factors purified from Ni-NTA resin. The resin is washed with lower concentration of 35mM Imidazole in order to prevent RF factors detaching during wash step. Factors eluted consecutively with a linear gradient from 35mM to 400mM Imizadole.



## Sequencing Verification Forward Primers

| gene     | primer sequence                          |
|----------|------------------------------------------|
| tsf.f    | glaaaacgacggcaGGCCGCATGAAGAAATTCAC       |
| infA.f   | glaaaacgacggcaTTTTTCGGCTCAGGTAACG        |
| infC.f   | glaaaacgacggcaTTGGCTTTAAAATCCGCGAG       |
| lepA.f   | glaaaacgacggcaACGCACATCATTGCGC           |
| infB.f   | glaaaacgacggcaAAGGGGTAGATCGTGATTGG       |
| tufA.f   | glaaaacgacggcaCCGCAGTTCTACTCCGTAC        |
| fusA.f   | glaaaacgacggcaCGTGATGCTCAAAGGTCA         |
| tufB.f   | glaaaacgacggcaCCGCAGTTCTACTCCGTAC        |
| frr.f    | glaaaacgacggcaGAAGCAGAACAGCGCG           |
| prfA.f   | glaaaacgacggcaCTTGAGCAGGGCGGC            |
| prfB.f   | glaaaacgacggcaGGCCGGATAACGGCG            |
| prfC_C.f | glaaaacgacggcaGAGTCAGTCAACGTTGCCA        |
| prfC_N.f | glaaaacgacggcaTTGCGACCTGCTGGC            |
| ileS.f   | glaaaacgacggcaATGTTGCAATGGACCTTACG       |
| proS.f   | glaaaacgacggcaGTGCTGCTGGATGACCG          |
| cysS.f   | glaaaacgacggcaCAAGAACCGGAAGCGTTCC        |
| leuS.f   | glaaaacgacggcaATGGTGAAGACTCCACG          |
| glnS.f   | glaaaacgacggcaTGCTTTATGCCTGATGCGA        |
| serS.f   | glaaaacgacggcaTTCAGGCACGTCGTATG          |
| asnS.f   | glaaaacgacggcaTCGACCTTCCGATATTAATAAAG    |
| tyrS.f   | glaaaacgacggcaCTGATGCAGGCACTGGTC         |
| pheT.f   | glaaaacgacggcaGTTGGCGTAAATCAGGTAGTTG     |
| pheS.f   | glaaaacgacggcaTTGAAAAATAAAAGCCTGTCTCATCA |
| thrS.f   | glaaaacgacggcaAGGTACAATCTCCCTTTTTTAGTGT  |
| aspS.f   | glaaaacgacggcaACTCCGCCGACG               |
| argS.f   | glaaaacgacggcaTTCAGTAAAAGCGTTAATTTACCCTG |
| metG.f   | glaaaacgacggcaGTCTTCTCCGGTATTCGTTCTG     |
| gltX.f   | glaaaacgacggcaGTTTCATCAGCTATTGAGGC       |
| hisS.f   | glaaaacgacggcaAAATTGATGACCAACCCAGCGC     |
| alaS.f   | glaaaacgacggcaCCAGCGTTTTCTGCTCTATCG      |
| lysS.f   | glaaaacgacggcaTTCTGGATCAGGTTGCC          |
| fmt.f    | glaaaacgacggcaAAAGCATCGGTATTGATACGG      |
| trpS.f   | glaaaacgacggcaATGTATGGTCATCTGAAAGGTGAAG  |
| glyS.f   | glaaaacgacggcaAAGCTGGAGCCGTAATTTAC       |
| glyQ.f   | glaaaacgacggcaAATCCGCTGCCGCTG            |
| valS.f   | glaaaacgacggcaGAAGATGAGCTGGCGCG          |
| rpsB.f   | glaaaacgacggcaGCAAAACAACCTGGGTATTCC      |
| rplC.f   | glaaaacgacggcaGGTTCTATCGGTGAGAACCAG      |
| rplL.f   | glaaaacgacggcaCTCAGATCGACCGCCTG          |

## Sequencing Verification Reverse Primers

| gene     | primer sequence                      |
|----------|--------------------------------------|
| tsf.r    | GTTCAACCAGTTCTTTGATTTCCTG            |
| infA.r   | AATAAAAAGGCCGGTTAAACCG               |
| infC.r   | TTTCCTTAACCTGGATAACCTTTTGG           |
| lepA.r   | ACCTGACGGGATCTGGAA                   |
| infB.r   | GATCGCGTTTCAAAAAGGTG                 |
| tufA.r   | CCCTTGACCGTAAAAACTGC                 |
| fusA.r   | GTGTGATTTCAACGTGAGAAGT               |
| tufB.r   | CACCTCATCGCTCCAGCG                   |
| frr.r    | AGAAGTTTCGCACCTCGCTT                 |
| prfA.r   | ATTGCTGTTCCAGTTGCTCG                 |
| prfB.r   | GGTTTCTTCGTCGTCAGCT                  |
| prfC_C.r | AAAAGCGATGAGTGATGAATAACG             |
| prfC_N.r | AGAAGTCTTCGTCGCCCG                   |
| ileS.r   | CCCAGCCAGGCACATAC                    |
| proS.r   | CCCCAAGGCTTGAGGAGA                   |
| cysS.r   | GTTTTTAACCGTCTCCTTGTATC              |
| leuS.r   | GGAATACCGATGCGGTATCTTT               |
| glnS.r   | TACCAGACCAGTGA AACCTAAC              |
| serS.r   | CGACTCACCTCAGCAGC                    |
| asnS.r   | TGCTGGCCTGAATTTCAAATG                |
| tyrS.r   | CAGGTGTGAATTTATCAATGGCG              |
| pheT.r   | GCGTTTTTCGACCCGGC                    |
| pheS.r   | GAGAGACATCAATCGTTTCCGC               |
| thrS.r   | GGCCGATTGCCATTTTGG                   |
| aspS.r   | TTCCGCGATGGCAGC                      |
| argS.r   | CATGTTTCAGCCAGGAATGC                 |
| metG.r   | CCGCTGCCGACG                         |
| gltX.r   | CAAGTTTGCGAGTTTATTCAGAACA            |
| hisS.r   | CCAGCCACCATAAGTATTTTTATT             |
| alaS.r   | TGCCAGCATTTTCAAGAA                   |
| lysS.r   | GCTACCCGCCACC                        |
| fmt.r    | CAGGTAATGCACGGTCCG                   |
| trpS.r   | AATTTTCAGTAAATTGAATATTTATCTTCAGGAATT |
| glyS.r   | TGTTTAACTGTCCAATTTTTGGG              |
| glyQ.r   | TTCTGCCGCTTTGCTCG                    |
| valS.r   | CGTACCACGGTATGCTTTATCG               |
| rpsB.r   | TTACCAGGGATGCGGTAATTC                |
| rplC.r   | TGTCCTGCGACGACG                      |
| rplL.r   | GAGCAGCCGGTGACG                      |
